# High Initial Titres of Anti-Spike Antibodies following SARS-CoV-2 Infection is Associated with Faster Decay Rates at Four Months Follow-Up

Vidya Menon, MD, FACP\*<sup>1</sup>, Masood A Shariff MD<sup>1</sup>, Victor Perez Gutierrez MD<sup>1</sup>, Juan M Carreño PhD<sup>2</sup>, Bo Yu MD<sup>1</sup>, Muzamil Jawed DO<sup>1</sup>, Marcia Gossai MD<sup>1</sup>, Elisenda Valdez MD<sup>1</sup>, Anjana Pillai MD<sup>1</sup>, Usha Venugopal MD<sup>1</sup>, Moiz Kasubhai MD<sup>1</sup>, Vihren Dimitrov MD<sup>1</sup>, Florian Krammer PhD<sup>2</sup>

Author affiliations:

<sup>1</sup>Department of Medicine, NYC Health + Hospitals/Lincoln, The Bronx, NY

<sup>2</sup>Department of Microbiology, Icahn School of Medicine at Mount Sinai, New York, NY

Keywords: SARS-CoV-2 Infection, anti-spike antibody, decay rate, COVID-19

Running Title: Decay Rates following SARS-CoV-2 Infection

Word count: 3396

\*Corresponding Author:

Vidya Menon, MD, FACP

NYC HHC/Lincoln

234 E 149th Street

The Bronx, New York 10451

Email: [menonv@nychhc.org](mailto:menonv@nychhc.org)

Phone: 718-579-5000 ext. 3485

## Key Points

**Question:** What is the decay rate of neutralizing antibodies among SARS-CoV-2 infected healthcare workers?

**Findings:** In this cohort study that included 178 healthcare workers, over a 4-month period following the COVID-19 pandemic, participants had an initial rise in anti-nucleocapsid (N) and anti-spike (S) antibodies, which was followed by decay and stabilization of the titres. Significant correlation with rate of decay was noted with the symptomatic participants.

**Meaning:** A strong correlation is observed in the decay of anti-S antibody titres based on symptomology, thus eluding to the fact that continued recommendations for infection protection and COVID-19 vaccine campaigns are necessary.

42 **Abstract**

43 Background

44 Dynamics of humoral immune responses to SARS-CoV-2 antigens following infection suggests  
45 an initial decay of antibody followed by subsequent stabilization. We aim to understand the  
46 longitudinal humoral responses to SARS-CoV-2 nucleocapsid (N) protein and spike (S) protein  
47 and to evaluate their correlation to clinical symptoms among healthcare workers (HCW).

48 Methods

49 In this cross-sectional longitudinal cohort study done in two phases over four months, HCW  
50 underwent serial qualitative serology testing for anti-N antibody, quantitative MSH-ELISA to  
51 detect Receptor Binding Domain and full-length S reactive antibodies and completed online  
52 surveys about COVID-19 related symptoms and healthcare/community exposure.

53 Results

54 Anti-N antibody positivity was 27% and anti-S positivity was 28% in Phase 1. In Phase 2 anti-S  
55 titres were higher in symptomatic than in asymptomatic positive subjects in Phase 1. Marginally  
56 higher titers were seen in asymptomatic compared to the symptomatic positive subgroup in  
57 Phase 2. A positive correlation was noted between age, number and duration of symptoms, and  
58 Phase 1 anti-S antibody titre. A strong correlation was observed between Phase 1 titers and decay  
59 of anti-S antibody titres between the two phases. Significant correlation with rate of decay was  
60 also noted with fever, GI symptoms, and total number and duration of COVID-19 symptoms.

61 Conclusions

62 Higher initial anti-S antibody titres were associated with larger number and longer duration of  
63 symptoms as well as faster decay during the two time points.

## 64 **Introduction**

65 In light of the unprecedented coronavirus disease 2019 (COVID-19) pandemic, understanding  
66 the role of the immune system in countering the viral infection is critical not just to design  
67 effective antiviral strategies but also to aid us in taking appropriate public health decisions. The  
68 early publication of the viral genome led to a rapid development of many nucleic acid based  
69 diagnostic assays for severe acute respiratory syndrome coronavirus 2 (SARS-CoV-2) infections.  
70 While nucleic acid-based tests are widely employed in the diagnosis of acute (current) SARS-  
71 CoV-2 infections, they are often limited in their clinical utility in identifying past infections or  
72 assess the level of immunity to SARS-CoV-2 within the communities. Evaluation of antibody  
73 responses is the other well-known modality used in a clinical setting that can detect both current,  
74 and past infections and is the preferred approach for surveillance to determine the true  
75 prevalence of infections. The currently available serological assays for SARS-CoV-2 target  
76 either the viral nucleoprotein (N) or the spike surface protein (S) antigens. The S-protein, which  
77 contains the receptor binding domain (RBD), binds to host cells via the angiotensin converting-  
78 enzyme-2 (ACE2) receptor, followed by membrane fusion<sup>1,2</sup>. The spike is the target of most  
79 neutralizing antibodies<sup>3-5</sup>, while the N plays an important role in transcription enhancement and  
80 viral assembly<sup>6</sup>. Studies have demonstrated that antibodies against the N and S appeared around  
81 the same time - between day 8 and day 14 after the onset of symptoms with antibodies to the N  
82 being more sensitive than anti S antibodies for detecting early infection<sup>7</sup>. Neutralizing antibodies  
83 confer protective immunity and can be detected in most infected individuals 10-15 days  
84 following the onset of COVID-19 symptoms and remain elevated following initial viral  
85 clearance<sup>8-12</sup>. There is compelling evidence suggesting that serological assays for anti-S  
86 antibodies predict neutralizing activity, in contrast to N based assays<sup>11,13</sup>.

87  
88 The detailed characterization of the dynamics of humoral immune responses to the SARS-CoV-2  
89 viral antigens following infection is still ongoing and early evidences suggest an initial decay of  
90 antibody followed by stabilization at a certain level<sup>11,14-18</sup>. These dynamics are likely driven by  
91 an initial expansion of plasmablasts which produce large amounts of antibody but die off quickly  
92 followed by a slower decay of antibody titres (the half-life of IgG is approximately three weeks)  
93 which then transitions into a steady state level of antibody produced by long-lived plasma cells<sup>19</sup>.  
94 However, it is currently unknown, if the magnitude of the initial expansion of plasmablast and  
95 the associated antibody titres are correlated with the steady state level of serum antibody  
96 produced by long-lived plasma cells. This is an important question since steady state antibody  
97 levels may provide superior protection from re-infection<sup>20,21</sup>.

98  
99 Specifically, there is currently a paucity of information on the kinetics of antibody decay among  
100 health care workers (HCW). It is suspected that SARS-CoV-2 infections among HCW are  
101 usually asymptomatic or mildly symptomatic and frequently associated with either  
102 underreporting of symptoms or heterogenous PCR and/or serologic diagnostics leading to most  
103 of them going undetected or unrecognized<sup>22</sup>. A large cohort study of HCWs in the greater New  
104 York City (NYC) area showed a seroprevalence of SARS-CoV-2 antibodies of 13.7%<sup>23</sup>. Our  
105 own data of anti N antibody screening among HCW at a New York City public hospital in the  
106 Bronx following the first “surge” of COVID-19 in May 2020, found that SARS-CoV-2  
107 seroprevalence was at 27%<sup>24</sup>. Understanding the longitudinal kinetics of SARS-CoV-2 antibody  
108 response and the effectiveness of commercial antibody measurement assays is crucial to

109 correctly determine infection rates, sero-prevalence and true sero-reversion rates in both infected  
110 and vaccinated individuals – and to better understand protection associated with sero-positivity.

111  
112 In this study, we aimed to investigate the longitudinal humoral responses to viral N and the spike  
113 and to evaluate their correlation to clinical symptoms and baseline characteristics in our HCW  
114 study cohort. Importantly, having access to samples during the initial antibody peak and several  
115 months out, we also aimed to determine if initial high antibody levels correlated with high  
116 antibody titers at steady state.

117  
118 **Methods**

### 119 **Study setting and population**

120 The study was a cross sectional cohort study done in two phases after receiving Institutional  
121 Review Board approval (IRB # 20-009, Lincoln Medical Center, Office of the Institutional  
122 Review Board approved as per 45 CFR 46 & 21 CFR50,56 under a full board committee and  
123 gave its approval on 4/28/2020). The Phase 1 was conducted in May/June, 2020 and the Phase 2  
124 was completed August/September 2020. The cohort included HCWs who worked at the New  
125 York City Public Hospital in the South Bronx and were willing to participate in both phases of  
126 the study. In the Phase 1 of the study, after informed consent, participants underwent qualitative  
127 serology testing (Abbott Architect SARS-CoV-2 IgG Assay, Abbott Park, IL 60064 USA)<sup>25</sup> and  
128 a nasopharyngeal swab for SARS-CoV-2 (Bio-Reference Laboratories, Inc., Elmwood Park, NJ,  
129 USA). They also completed an initial online survey on demographics, symptoms of COVID-19,  
130 healthcare/community exposure etc. An extra sample was collected and stored at -80°C for  
131 subsequent analysis. These samples were processed using a quantitative enzyme-linked

132 immunosorbent assay (ELISA) that correlates well with virus neutralization, developed by  
133 Mount Sinai Health System (MSH ELISA)<sup>26,27</sup>, to detect RBD and full-length spike (S) reactive  
134 antibodies. Participants from Phase 1 who agreed to return for follow up serology testing (Abbott  
135 and MSH ELISA) and completion of a follow-up online survey were part of Phase 2 of the study.

136

### 137 **Antibody assays**

138 The Abbott Architect assay uses a qualitative chemiluminescent microparticle immunoassay  
139 technology targeting the N antigen of the virus with a reported sensitivity of 100% (CI 95.8–  
140 100%) and specificity of 99.6% (CI 99–99.9%)<sup>25</sup>. The MSH ELISA consists of an initial ELISA  
141 using serum or plasma to detect specific IgG against the RBD of SARS-CoV-2 at a single  
142 dilution, followed by quantitative titrations of presumptive positives in a confirmatory ELISA  
143 against full length SARS-CoV-2 spike protein (S)<sup>28</sup>. The positive result from the spike ELISA is  
144 reported as antibody at a titre of 1:80 or higher. Test performance assessment revealed that PCR+  
145 samples were 94 % positive and all negative samples returned a negative result for 100%  
146 negative agreement<sup>29</sup>.

147

### 148 **Survey**

149 The online survey was accessed by a unique identification number assigned to each participant,  
150 blinded to the research team to ensure confidentiality. The survey requested information on age,  
151 race/ethnicity, comorbidities, domestic/international travel and healthcare and community  
152 exposure details during and prior to both phases. The first phase collected information about  
153 symptoms of COVID-19 including their timing and duration in the preceding weeks of the blood  
154 draw<sup>24</sup>. The Phase 2 survey requested information on new comorbidities, persistent COVID-19

155 symptoms (cough, shortness of breath, anosmia, ageusia, myalgia, nausea, and/or diarrhea),  
156 interim testing via antibody and/or reverse transcription polymerase chain reaction (RT -PCR) (if  
157 present) and their result (positive/negative), presence of positive SARS-CoV-2 PCR results in  
158 the preceding months, interim domestic/international travel and continued use of personal  
159 protective equipment (PPE). The risk of exposure in the healthcare setting and community  
160 exposure was determined based on CDC guidelines<sup>30</sup>.

161

## 162 **Statistical analysis**

163 Descriptive statistics were used to summarize the baseline characteristics of the cohort and key  
164 study outcome variables. Categorical variables were compared by the Chi-squared test, while  
165 continuous variables were compared by a Student's t-test. The spike antibody titres were  
166 described as geometric means. Correlations were calculated using standard Pearson and  
167 Spearman correlation. Multiple linear regression was applied to determine the predictors of  
168 log<sub>10</sub> rate of decay from Phase 1 to Phase 2 of anti-spike antibodies. A p-value of <0.05 was  
169 considered significant. All statistical analyses were performed using SPSS version 27 (IBM,  
170 USA).

171

## 172 **Results**

173 For Phase 1 of our study, 500 healthcare workers underwent both PCR and serology testing. Of  
174 these, 137 were positive by for anti-N antibody (Abbott) and 142 were positive by the MSH  
175 ELISA. For the second phase 178 participants from the initial cohort consented and underwent  
176 evaluation with PCR, antibody assays (Abbott and MSH ELISA) and completed the online  
177 follow up survey. The details of patient enrolment are described in **Figure 1**. While 46 of the 178

178 tested subjects remained positive for the anti-N antibody (Abbott), 70 were positive by the MSH  
179 ELISA in the second phase. Anti -spike titres of the 5 subjects in the first phase were close to the  
180 cut off for positivity. Twenty-two subjects who were negative for anti-N antibody in Phase 2 had  
181 positive titres of anti-RBD and anti-spike antibodies, though lower than their Phase 1 levels.  
182 Among the subjects who participated in the Phase 1 and Phase 2 study, 68 were positive in both  
183 phases by the MSH ELISA, 110 were negative in both phases and 2 were positive only in Phase  
184 2 with previously negative results in Phase 1.

185  
186 The baseline characteristics of study participants who were positive by MSH ELISA in both  
187 phases (n=68) and those who were negative in both phases (n=108) are shown in **Table 1**. The  
188 mean age of the participants was  $44.7 \pm 12.4$  years, and 63.1% were female. Overall, 30.7% of the  
189 HCWs were Latinx, 29.5% were Asian, 16.5% were Black and 17.6% were White. COVID-19  
190 related symptoms were present in 83.8% (57) of the subjects who were positive in both phases,  
191 while only 42.6% (46) of the subgroup who had negative antibodies in both phases admitted to  
192 symptoms prior to Phase 1. The duration of symptoms prior to Phase 1 was longer among the  
193 symptomatic positive group (48.3% for >14 days) in comparison to symptomatic negative group  
194 (17.8% for >14 days). The mean duration of symptoms to Phase 1 testing in the symptomatic  
195 positive sub cohort was  $47.9 \pm 16.0$  days. Persisting symptoms of COVID-19 were reported in 19  
196 (27.9%) subjects from the cohort with positive antibodies in both phases.

197  
198 **Clinical characteristics and seropositivity to spike protein in both phases**  
199 **Table 2** describes the characteristics of the symptomatic and asymptomatic subjects who were  
200 positive for anti-spike antibody in both phases. Baseline characteristics were comparable



201 between the groups and no difference either in the healthcare or community exposure or in the  
202 location of work (ED/Inpatient/intensive care unit, OR etc.) between the two groups was  
203 observed. Titres of anti-spike antibodies (geometric mean area under the curve (AUC)) were  
204 higher in symptomatic subjects than in asymptomatic positive subjects (6754 AUC vs. 5803  
205 AUC) in Phase 1. However, in the Phase 2 analysis we observed marginally higher titres in the  
206 asymptomatic subgroup compared to the symptomatic subgroup (2383 AUC vs. 2198 AUC). The  
207 rate of decay was higher in the symptomatic subgroup (geometric mean 32.96 per day) compared  
208 to the asymptomatic (geometric mean 23.42 per day) suggesting delayed antibody/kinetics in the  
209 asymptomatic cohort.

210

### 211 **Phase 1 anti-spike antibody titre and clinical correlations**

212 A Pearson's product and Spearman's rank-order correlation was run to assess the relationship  
213 between cohort characteristics including age, gender, comorbidities, number of symptoms of  
214 COVID-19, healthcare exposure and Phase 1 anti-spike titres in our cohort (**Figure 2**). One  
215 hundred-forty-three subjects with a positive test in Phase 1 were included in the analysis. Scatter  
216 plot analysis showed a monotonic relationship between the variables. A statistically significant  
217 weak positive correlation was observed between age and Phase 1 anti-spike antibody titres  
218 ( $R=0.269$ ,  $p<0.005$ ). Moderate positive correlation was present between presence of fever  
219 ( $R=0.319$ ,  $p<0.005$ ), number of symptoms ( $R=0.310$ ,  $p<0.005$ ) and days of symptoms ( $R=0.434$ ,  
220  $p<0.005$ ) and anti-spike antibody titre; and weak positive correlation was observed with upper  
221 respiratory symptoms ( $R=0.278$ ,  $p<0.005$ ) and gastrointestinal (GI) symptoms ( $R=0.204$ ,  
222  $p<0.05$ ) with anti-spike antibody titres.

223

224 **Correlation of rate of decay of anti-spike antibody titres from Phase 1 to Phase 2 and**  
225 **clinical characteristics**

226 Results of Pearson correlation to assess the relationship between cohort characteristics including  
227 Phase 1 anti-spike antibody titres, age, gender, comorbidities, symptoms of COVID-19, number  
228 of symptoms of COVID-19, healthcare exposure and decay of anti-spike titres between the two  
229 phases in our cohort is shown in **Figure 3**. A strong positive statistically significant correlation  
230 was observed between Phase 1 titers and decay of anti-spike antibody titres between the two  
231 phases ( $R=0.898$ ,  $p<0.000$ ). Medium positive correlation was observed between presence of  
232 fever ( $R=0.428$ ,  $p<0.001$ ), GI symptoms ( $R=0.340$ ,  $p<0.011$ ), number of symptoms ( $R=0.357$ ,  
233  $p<0.007$ ), duration of symptoms ( $R=0.469$ ,  $p<0.000$ ) with decay of anti-spike antibody titres  
234 between the two phases respectively.

235  
236 A pairwise comparison was performed between rate of decay of anti-spike antibody titres and  
237 patient characteristics (**Figure 4**). Rate of decay by gender was comparable (male; 30.73  
238 AUC/day vs. female; 34.68 AUC/day,  $p=0.413$ ). Asian (86.0 AUC/day) race showed higher rate  
239 of decay compared with White (7.2 AUC/day) and Black (19.61 AUC/day) individuals; while  
240 Latinx (47.28 AUC/day) race had higher rate of decay compared with White (7.2 AUC/day)  
241 individuals. Subjects with fever had a higher rate of decay than those who did not report fever  
242 (53.08 AUC/day vs. 16.14 AUC/day,  $p=0.002$ ). Similarly subjects with GI symptoms had a  
243 higher rate of decay than those without (55.81 AUC/day vs. 21.94 AUC/day,  $p=0.019$ ). Subjects  
244 with symptoms restricted to less than seven days demonstrated a lower decay rate compared with  
245 symptomatic subjects over 7-14 days (13.60 AUC/day vs. 36.12 AUC/day,  $p=0.046$ ) and when  
246 compared with symptomatic subjects with more than 14 days (13.60 AUC/day vs. 59.72

247 AUC/day,  $p=0.001$ ). This finding was statistically significant. No difference was found when  
248 degree of exposure (High/Moderate: 28.18 AUC/day vs. Mild: 34.78 AUC/day,  $p=0.395$ ) or job  
249 role (physician: 29.57 AUC/day vs. nurse: 53.59 AUC/day vs. Other: 26.83 AUC/day;  $p=0.361$ )  
250 was compared to rate of decay.

251

### 252 **Predictors of rate of decay from Phase 1 to Phase 2 of anti-spike antibodies**

253 Multiple linear regression analysis to predict the rate of decay with respect to age, Bacillus  
254 Calmette Guerin vaccination, number of symptoms, and Phase 1 ( $\log_{10}$ ) anti-spike antibody  
255 titres is shown in **Table 3**. On the basis of a linear regression model that included the participants  
256 age, history of BCG vaccination, total number of COVID-19 symptoms and the Phase 1  
257 concentration of  $\log_{10}$  spike antibody titres, the estimated change (decay) was 23.6 AUC/day  
258 when age was centred at median (42.6 years), there was positive history of BCG vaccination, the  
259 total number of COVID-19 symptoms were centred at a median of 4, and the geometric mean of  
260 the  $\log_{10}$  spike antibody titre was 3.78.

261

### 262 **Discussion**

263 With the COVID-19 pandemic showing no signs of abating, healthcare workers at the epicentre  
264 are at risk of infection due to occupational exposure as well as community exposure. Sero-  
265 surveillance is the foundation for determining the scale and rate of exposures. With a multitude  
266 of serological assays getting emergency use approval from FDA, interpretation of the results of  
267 these assays and their clinical significance remains challenging. It is critical to understand the  
268 timing of the antibody response for acute interpretation. Confidence in analytical specificity of  
269 the assay is a critical requirement in measurement of the specific antibody responses. Recent

270 studies have confirmed that anti spike titres especially anti-RBD titres can serve as surrogates for  
271 virus neutralization<sup>31,32</sup>. The Abbott SARS-CoV-2 IgG assay that targets antibodies to the  
272 nucleoprotein has a reported specificity and sensitivity of greater than 99% at 14 days or more  
273 following symptom onset and these measurements are not indicative or correlated to virus  
274 neutralization titres<sup>33</sup>. In comparison, the MSH ELISA targets the full-length S protein including  
275 RBD, a major target for neutralizing antibodies and has demonstrated excellent correlation to  
276 virus neutralization<sup>11,26</sup>. Longitudinal measurements of antibody levels have revealed that anti-N  
277 and anti S IgG antibodies continue to increase until the third week post symptoms and an  
278 approach that combines the detection of both of these antibodies would precisely detect almost  
279 100% of all infectious exposures<sup>34</sup>. In our study, the mean number of days after symptoms to  
280 testing in Phase 1 was 47 days suggesting a higher likelihood of accuracy of the utilized assay.

281  
282 Longitudinal blood sampling among HCWs working at a public hospital in the epicentre of the  
283 pandemic in NYC allowed for analysis of kinetics of anti-S and anti-N antibody responses. At  
284 two months after the first surge of infections, anti-N antibodies were detected in 27% and anti-S  
285 antibodies in 28% of participating HCWs. After an interval of four months, it is not surprising to  
286 note that among the participants who returned, 26% remained positive for anti N antibodies,  
287 while 31% of the previously anti-N antibody positive subjects tested negative in phase 2. On the  
288 other hand, a similar analysis of the anti-S antibodies levels, confirmed that all the previously  
289 positive retested subjects continued to remain positive, albeit with lower titres.

290  
291 COVID-19 related symptoms were significantly associated with positive anti-spike antibodies in  
292 both phases, with a similar association with longer duration (>14 days) of symptoms. Previous

293 studies have demonstrated a lower level of IgG response among patients without symptoms or  
294 with mild symptoms compared to those with severe and critical disease<sup>35,36</sup>. A comparison of  
295 symptomatic versus asymptomatic subjects who tested positive for anti-spike antibodies in both  
296 phases, confirmed that the rate of decay of anti-spike antibody titres were faster in the  
297 symptomatic cohort than the asymptomatic subjects, which was seen also in the anti-N antibody  
298 kinetics. However, we observed a faster decay in this group with a lower titre of anti-spike  
299 antibodies in Phase 2 compared to the asymptomatic cohort (though the difference was not  
300 statistically significant). This could additionally be supported by the finding of fever and GI  
301 symptoms contributing to faster decay. Similar results of decreasing neutralizing antibody titre in  
302 symptomatic than asymptomatic patients were observed by Choe *et al.*<sup>37</sup>

303  
304 Positive correlations for age, presence of fever, upper respiratory symptoms, GI symptoms, total  
305 number and duration of symptoms was observed with increased levels of anti-spike titres at  
306 Phase 1. Similar results of neutralizing antibody titres were also observed by  
307 Boonyaratanakornkit *et al.* wherein they showed higher levels of neutralizing antibody titres  
308 were significantly associated with male gender, older adults, higher disease severity and shorter  
309 interval from recovery<sup>38</sup>. Based on a linear regression model with age centred at median (42.6  
310 years), positive history of BCG vaccination, the total number of COVID-19 symptoms centred at  
311 a median of 4, and the geometric mean of the log<sub>10</sub> anti-spike antibody titre at 3.78, we observed  
312 that the rate of decay of these antibody titres was 23.6 AUC/day. Evaluation of other  
313 characteristics with rate of decay between Phase 1 and Phase 2 showed a faster reduction in titres  
314 in Asian participants and in those with fever and GI symptoms. A slower decrease was noted

315 among patients with shorter duration (<7 days) of symptoms, with no other significant  
316 correlation noted with any other baseline demographics or clinical characteristics.

317 As described above, higher antibody titers are associated with a larger number of symptoms,  
318 longer duration of symptoms and – as described by others as well – disease severity in general.  
319 We also found that higher initial antibody titers were associated with faster antibody decay  
320 during the two time points. Initial antibody responses are driven by short lived plasmablasts,  
321 which decay after a few days after producing massive amounts of antibody. IgG has a relatively  
322 long half-life of approximately three weeks, but decay is inevitable since the plasmablasts  
323 initially producing it disappear. Usually, titers then drop until they reach relatively stable levels  
324 of antibody which are maintained by long-lived plasma cells in the bone marrow<sup>19</sup>. The two time  
325 points described in this study represent the initial peak response and likely the stable level after  
326 the initial decay. We found that individuals with higher initial titers had a faster decay rate  
327 during the observation period meaning the difference between peak and stable, long-lived  
328 antibody levels were larger. This indicates that there is likely no direct correlation between the  
329 magnitude of the initial expansion of plasmablasts and the number of long-lived plasma cells that  
330 migrate to the bone marrow.

331 Our study has the following limitations: First being a single center study with a small  
332 convenience sampling that included a smaller number of participants in Phase 2 of the study.  
333 Following the pandemic, the HCWs who volunteered from around the country were transferred  
334 back and lost to follow-up, which did decrease the overall sample size, but the rates of positive  
335 and negative results remained proportional. Second, the likelihood of a recall bias in the  
336 participant's responses on the online survey may exist. Lastly, as a cross-sectional

337 seroprevalence study the findings can underestimate rates of prior infections based on timing of  
338 the testing given that antibodies are only transiently detectable following infection.

339 In conclusion, findings from this study are similar to other studies that have reported that higher  
340 magnitude of anti-spike titres may correlate with protection against reinfection, in spite of the  
341 observed decay in the antibody levels<sup>20,21</sup>. Nevertheless, further studies to evaluate the longevity  
342 of immunity, especially in context of widespread administration of spike-based vaccine among  
343 HCWs would be important in predicting herd immunity to COVID-19 infections.

#### 344 **Funding**

345 The authors received no specific funding for this work.

346

#### 347 **Acknowledgements**

348 The authorship is structured in first-last-author-emphasis. We thank the COVID-19 Testing Tent  
349 staff for their invaluable assistance with this study with testing and accommodation of study  
350 participants for Phase 2: Patrick C McNeil PA-C MPAS; Aney D Patel PA-C MPAS; and Megan  
351 Corley DNP ANP-BC. We thank the Nursing staff for their commitment and support with the  
352 workflow, especially, Karen Philip and Kenisha Williamson with others; additionally, the  
353 Registration (Lexus Gonzalez and Taj Washington) and Patient Care Associate (Eva Penn) that  
354 assisted the research team. We also thank the Occupational Health Services for accommodating  
355 the research team during project completion. The Clinical Laboratory staff played a part in  
356 allocating resources for Abbott Architect usage: Dior Ndao and Ayman Elshamshery. We thank  
357 the study participants, who were essential health care workers, who volunteered to follow-up in  
358 this protocol.

359

360 **Contributions**

361 V.M., M.A.S. and U.V. designed the study. J.M.C., M.A.S., B.Y., V.P.G. analysed the data. E.V.  
362 and M.G. assisted with participant follow-up and coordination with the assistance of A.P., U.V.,  
363 V.M., and M.A.S. The Mount Sinai Health System team, J.M.C. and F.K., performed the  
364 measurements for anti-Spike and Anti-RBD antibodies. V.M., U.V. and A.P. were responsible  
365 for the clinical care of the research participants and supervised the day-to-day operation and  
366 coordination of the study by M.K., V.D., M.A.S., B.Y., V.P.G., M.G., E.V., and M.G.  
367 V.M. and F.K wrote the manuscript and is the guarantor of this work and has full access to all  
368 data in the study and takes responsibility for the integrity of the data and the accuracy of the data  
369 analysis, with the assistance of J.C.Q., M.A.S., B.Y., V.P.G., and M.G.  
370 All authors critically revised the draft and approved the final manuscript.

371

372 **Potential conflicts of interest**

373 F.K. is listed as a co-inventor on a patent application filed by The Icahn School of Medicine at Mount  
374 Sinai relating to SARS-CoV-2 serological assays and NDV-based SARS-CoV-2 vaccines. Mount Sinai  
375 has spun out a company, Kantaro, to market serological tests for SARS-CoV-2. F.K. has consulted for  
376 Merck and Pfizer (before 2020), and is currently consulting for Seqirus and Avimex. F.K.'s Krammer  
377 laboratory is also collaborating with Pfizer on animal models of SARS-CoV-2.  
378 All other authors report no potential conflicts. All authors have submitted the ICMJE Form for  
379 Disclosure of Potential Conflicts of Interest.



380 References

- 381 1. Ou X, Liu Y, Lei X, et al. Characterization of spike glycoprotein of SARS-CoV-2 on  
382 virus entry and its immune cross-reactivity with SARS-CoV. *Nat Commun.*  
383 [2020;11\(1\):1620](https://doi.org/10.1038/s41467-020-1620-2).
- 384 2. Walls AC, Park YJ, Tortorici MA, Wall A, McGuire AT, Velesler D. Structure, Function,  
385 and Antigenicity of the SARS-CoV-2 Spike Glycoprotein. *Cell.* [2020;181\(2\):281-292](https://doi.org/10.1016/j.cell.2020.05.014).
- 386 3. Premkumar L, Segovia-Chumbez B, Jadi R, et al. The receptor binding domain of the  
387 viral spike protein is an immunodominant and highly specific target of antibodies in  
388 SARS-CoV-2 patients. *Sci Immunol.* [2020;5\(48\):eabc8413](https://doi.org/10.1126/sciimmunol.abc8413).
- 389 4. Ni L, Ye F, Cheng ML, et al. Detection of SARS-CoV-2-Specific Humoral and Cellular  
390 Immunity in COVID-19 Convalescent Individuals. *Immunity.* [2020;52\(6\):971-977](https://doi.org/10.1016/j.immuni.2020.05.014)
- 391 5. Iyer AS, Jones FK, Nodoushani A, et al. Persistence and decay of human antibody  
392 responses to the receptor binding domain of SARS-CoV-2 spike protein in COVID-19  
393 patients. *Sci Immunol.* [2020; 5\(52\):eabe0367](https://doi.org/10.1126/sciimmunol.abe0367).
- 394 6. Cong Y, Ulasli M, Schepers H, et al. Nucleocapsid Protein Recruitment to Replication-  
395 Transcription Complexes Plays a Crucial Role in Coronaviral Life Cycle. *J Virol.*  
396 [2020;94\(4\):e01925-19](https://doi.org/10.1128/JVI.01925-19).
- 397 7. Burbelo PD, Riedo FX, Morishima C, et al. Detection of Nucleocapsid Antibody to  
398 SARS-CoV-2 is More Sensitive than Antibody to Spike Protein in COVID-19 Patients.  
399 *medRxiv [Preprint].* [2020;2020.04.20.20071423](https://doi.org/10.1101/2020.04.20.20071423)
- 400 8. Long QX, Liu BZ, Deng HJ, Wu GC, Deng K, Chen YK. Antibody responses to SARS-  
401 CoV-2 in patients with COVID-19. *Nat Med.* [2020;26\(6\):845-848](https://doi.org/10.1038/s41591-020-0845-8).
- 402 9. İnandıklioğlu N, Akkoc T. Immune Responses to SARS-CoV, MERS-CoV and SARS-  
403 CoV-2. *Adv Exp Med Biol.* [2020;1288:5-12](https://doi.org/10.1007/978-1-4939-9888-8_5).
- 404 10. Chaudhuri S, Thiruvengadam R, Chattopadhyay S ,et al. Comparative evaluation of  
405 SARS-CoV-2 IgG assays in India. *J Clin Virol.* [2020;131:104609](https://doi.org/10.1016/j.jcv.2020.104609).
- 406 11. Wajnberg A, Amanat F, Firpo A, et al. Robust neutralizing antibodies to SARS-CoV-2  
407 infection persist for months. *Science.* [2020;370\(6521\):1227-1230](https://doi.org/10.1126/science.aba7221).
- 408 12. Crawford KHD, Dingens AS, Eguia R, et al. Dynamics of neutralizing antibody titers in  
409 the months after SARS-CoV-2 infection. *J Infect Dis.* [2020;jiaa618](https://doi.org/10.1093/infdis/jiaa618).
- 410 13. Luchsinger LL, Ransegnola BP, Jin DK, et al. Serological Assays Estimate Highly  
411 Variable SARS-CoV-2 Neutralizing Antibody Activity in Recovered COVID-19 Patients.  
412 *J Clin Microbiol.* [2020;58\(12\)](https://doi.org/10.1128/JCM.01812-20)
- 413 14. Iyer AS, Jones FK, Nodoushani A, et al. Dynamics and significance of the antibody  
414 response to SARS-CoV-2 infection. *medRxiv.* [2020;2020.07.18.20155374](https://doi.org/10.1101/2020.07.18.20155374).
- 415 15. Isho B, Abe KT, Zuo M, et al. Persistence of serum and saliva antibody responses to  
416 SARS-CoV-2 spike antigens in COVID-19 patients. *Sci Immunol.* [2020;5\(52\): eabe5511](https://doi.org/10.1126/sciimmunol.abe5511).
- 417 16. Wu F, Wang A, Liu m, et al. Neutralizing antibody responses to SARS-CoV-2 in a  
418 COVID-19 recovered patient cohort and their implications. *medRxiv,*  
419 [2020;2020.03.30.20047365](https://doi.org/10.1101/2020.03.30.20047365).
- 420 17. Seow J, Graham C, Merrick B, et al. Longitudinal observation and decline of neutralizing  
421 antibody responses in the three months following SARS-CoV-2 infection in humans. *Nat*  
422 *Microbiol.* [2020;5\(12\):1598-1607](https://doi.org/10.1038/s41564-020-0607-2).
- 423 18. Grandjean L, Saso A, Torres A, et al. Humoral Response Dynamics Following Infection  
424 with SARS-CoV-2. *medRxiv,* [2020;2020.07.16.20155663](https://doi.org/10.1101/2020.07.16.20155663).

- 425 19. Ellebedy A, Turner J, Kim W, et al. SARS-CoV-2 infection induces long-lived bone  
426 marrow plasma cells in humans. *Res Sq [Preprint]*. 2020;rs.3.rs-132821.
- 427 20. Lumley SF, O'Donnell D, Stoesser NE, et al. Antibody Status and Incidence of SARS-  
428 CoV-2 Infection in Health Care Workers. *N Engl J Med*. 2021;384(6):533-540.
- 429 21. Hall V, Foulkes S, Charlett A, et al. Do antibody positive healthcare workers have lower  
430 SARS-CoV-2 infection rates than antibody negative healthcare workers? Large multi-  
431 centre prospective cohort study (the SIREN study), England: June to November 2020.  
432 *medRxiv*, 2021;2021.01.13.21249642.
- 433 22. Self WH, Tenforde MW, Stubblefield WB, et al. Seroprevalence of SARS-CoV-2 Among  
434 Frontline Health Care Personnel in a Multistate Hospital Network. *13 Academic Medical  
435 Centers, April-June 2020. MMWR Morb Mortal Wkly Rep*. 2020;69(35):1221-1226.
- 436 23. Moscola J, Sembajwe G, Jarrett M, et al. Prevalence of SARS-CoV-2 Antibodies in  
437 Health Care Personnel in the New York City Area. *JAMA*. 2020;324(9):893-895.
- 438 24. Venugopal U, Jilani N, Rabah S, et al. SARS-CoV-2 seroprevalence among health care  
439 workers in a New York City hospital: A cross-sectional analysis during the COVID-19  
440 pandemic. *Int J Infect Dis*. 2021;102:63-69
- 441 25. H Hamilton F, Muir P, Attwood M, et al. Kinetics and performance of the Abbott architect  
442 SARS-CoV-2 IgG antibody assay. *J Infect*. 2020;81(6):e7-e9.
- 443 26. Amanat F, Stadlbauer D, Strohmeier S, et al. A serological assay to detect SARS-CoV-2  
444 seroconversion in humans. *Nat Med*. 2020;26(7):1033-1036.
- 445 27. Stadlbauer D, Amanat F, Chromikova V, et al. SARS-CoV-2 Seroconversion in Humans:  
446 A Detailed Protocol for a Serological Assay, Antigen Production, and Test Setup. *Curr  
447 Protoc Microbiol*. 2020;57(1):e100.
- 448 28. Amanat F, Stadlbauer D, Strohmeier S, et al. A serological assay to detect SARS-CoV-2  
449 seroconversion in humans. *Nat Med*. 2020;26(7):1033-1036.
- 450 29. Stadlbauer D, Tan J, Jiang K, et al. Repeated cross-sectional sero-monitoring of SARS-  
451 CoV-2 in New York City. *Nature*. 2021;590(7844):146-150.
- 452 30. Garcia M, Lipskiy N, Tyson J, Watkins R, Esser ES, Kinley T. Centers for Disease  
453 Control and Prevention 2019 novel coronavirus disease (COVID-19) information  
454 management: addressing national health-care and public health needs for standardized  
455 data definitions and codified vocabulary for data exchange. *J Am Med Inform Assoc*.  
456 2020;27(9):1476-1487
- 457 31. Therrien C, Serhir B, Bélanger-Collard M, et al. Multicenter Evaluation of the Clinical  
458 Performance and the Neutralizing Antibody Activity Prediction Properties of ten high  
459 throughput serological assays used in Clinical Laboratories. *J Clin Microbiol*.  
460 2020;JCM.02511-20.
- 461 32. Muecksch F, Wise H, Batchelor B, et al. Longitudinal analysis of clinical serology assay  
462 performance and neutralising antibody levels in COVID19 convalescents. *medRxiv*,  
463 2020;2020.08.05.20169128.
- 464 33. Rosadas C, Randell P, Khan M, McClure MO, Tedder RS. Testing for responses to the  
465 wrong SARS-CoV-2 antigen? *Lancet*. 2020;396(10252):e23.
- 466 34. Sun B, Feng Y, Mo X, et al. Kinetics of SARS-CoV-2 specific IgM and IgG responses in  
467 COVID-19 patients. *Emerg Microbes Infect*. 2020;9(1):940-948.
- 468 35. Long QX, Tang XJ, Shi QL, et al. Clinical and immunological assessment of  
469 asymptomatic SARS-CoV-2 infections. *Nat Med*. 2020; 26(8):1200-1204.
- 470 36. Wang Y, Zhang L, Sang L, et al. Kinetics of viral load and antibody response in relation

- 471 to COVID-19 severity. *J Clin Invest*. 2020;130(10):5235-5244.
- 472 37. Choe PG, Kang CK, Suh HJ, et al. Waning Antibody Responses in Asymptomatic and  
473 Symptomatic SARS-CoV-2 Infection. *Emerg Infect Dis*. 2021;27(1):327-329.
- 474
- 475 38. Boonyaratanakornkit J, Morishima C, Selke S, et al. Clinical, laboratory, and temporal  
476 predictors of neutralizing antibodies to SARS-CoV-2 after COVID-19. *medRxiv*. 2020;  
477 2020.10.06.20207472.
- 478
- 479
- 480

481 Table 1: Broad characteristics among health care workers assessed for antibody reactivity to  
 482 spike SARS-CoV-2 protein in Phase 1 and Phase 2

483

|                                                           | Overall †   | Spike ELISA<br>(AUC)<br>positive in<br>both phases | Negative<br>Reactivity to spike<br>(AUC) in both<br>phases | p value |
|-----------------------------------------------------------|-------------|----------------------------------------------------|------------------------------------------------------------|---------|
|                                                           | N=176       | n=68                                               | n=108                                                      |         |
| Age, years                                                | 44.7+12.4   | 42.9+11.9                                          | 45.8+12.7                                                  | 0.099   |
| Female, Gender                                            | 111 (63.1%) | 40 (58.8%)                                         | 71 (65.7%)                                                 | 0.467   |
| Race                                                      |             |                                                    |                                                            | 0.666   |
| Latinx                                                    | 54 (30.7%)  | 21 (30.9%)                                         | 33 (30.6%)                                                 |         |
| Asian                                                     | 52 (29.5%)  | 18 (26.5%)                                         | 34 (31.5%)                                                 |         |
| Black                                                     | 29 (16.5%)  | 15 (22.1%)                                         | 14 (13.0%)                                                 |         |
| White                                                     | 31 (17.6%)  | 10 (14.7%)                                         | 21 (19.4%)                                                 |         |
| Other                                                     | 10 (5.7%)   | 4 (5.9%)                                           | 6 (5.9%)                                                   |         |
| Comorbidities                                             | 54 (30.7%)  | 25 (36.8%)                                         | 29 (26.9%)                                                 | 0.214   |
| BCG vaccine received in<br>childhood                      | 87 (49.4%)  | 35 (51.5%)                                         | 52 (48.1%)                                                 | 0.902   |
| COVID-19 related symptoms<br>prior to Phase 1             | 103 (58.5%) | 57 (83.8%)                                         | 46 (42.6%)                                                 | <.001   |
| Duration of symptoms                                      |             |                                                    |                                                            | <.001   |
| <7 days                                                   | 48 (46.6%)  | 18 (31.0%)                                         | 30 (66.7%)                                                 |         |
| 7-14 days                                                 | 19 (18.4%)  | 12 (20.7%)                                         | 7 (15.6%)                                                  |         |
| >14 days                                                  | 36 (35.0%)  | 28 (48.3%)                                         | 8 (17.8%)                                                  |         |
| Time from symptom to<br>positive result, days             | 45.7+19.9   | 47.9+16.0                                          | 42.9+24.1                                                  | 0.062   |
| RT-PCR positive result for<br>SARS-CoV-2 prior to Phase 1 | 51 (29.0%)  | 49 (72.1%)                                         | 2 (1.9%)                                                   | <.001   |
| RT-PCR positive result for<br>SARS-CoV-2 during Phase 1   | 14 (8.0%)   | 13 (19.1%)                                         | 1 (0.9%)                                                   | <.001   |
| Persisting symptoms from<br>COVID-19                      | 25 (14.2%)  | 19 (27.9%)                                         | 6 (5.6%)                                                   | <.001   |
| Nature of work                                            |             |                                                    |                                                            | 0.306   |
| Physicians                                                | 81 (46.0%)  | 29 (42.6%)                                         | 52 (51.5%)                                                 |         |
| Nurses                                                    | 29 (16.5%)  | 15 (22.1%)                                         | 14 (13.0%)                                                 |         |
| Others                                                    | 64 (36.4%)  | 24 (35.3%)                                         | 40 (39.6%)                                                 |         |
| Hospital areas worked in:                                 |             |                                                    |                                                            |         |
| Emergency<br>department/Inpatient units                   | 118 (67.0%) | 50 (73.5%)                                         | 68 (63.0%)                                                 | 0.141   |
| Ambulatory care/Clinics                                   | 72 (40.9%)  | 27 (39.7%)                                         | 45 (41.7%)                                                 | 0.631   |

|                                         |             |            |             |       |
|-----------------------------------------|-------------|------------|-------------|-------|
| Administration/Non-clinical care areas  | 24 (13.6%)  | 9 (13.2%)  | 15 (13.9%)  | 0.867 |
| Community exposure                      | 47 (26.7%)  | 19 (27.9%) | 28 (25.9%)  | 0.591 |
| Household exposure                      | 39 (22.2%)  | 17 (25.0%) | 22 (20.4%)  | 0.343 |
| PPE use at work                         | 173 (98.3%) | 67 (98.5%) | 106 (98.1%) | 0.226 |
| Use of facemask outside of the hospital | 158 (89.8%) | 58 (85.3%) | 100 (92.6%) | 0.062 |

Continuous variables are expressed as mean (SD), categorical variables as n (%).

BCG, Bacillus Calmette–Guérin vaccine; PPE, personal protective equipment; RT-PCR, reverse transcription polymerase chain reaction.

† Demographic data is missing for 2 participants from the overall cohort.

484

485

486

487

488

Table 2: Broad characteristics among health care workers with positive antibody reactivity to SARS-CoV-2 spike in both phases

|                                  | Overall            | Asymptomatic for SARS-CoV-2 infection | Symptomatic for SARS-CoV-2 infection | <i>p</i> value |
|----------------------------------|--------------------|---------------------------------------|--------------------------------------|----------------|
|                                  | n=68               | n=11                                  | n=57                                 |                |
| Age, Mean ( $\pm$ SD)            | 42.9 ( $\pm$ 1.45) | 44.5 ( $\pm$ 3.8)                     | 42.6 ( $\pm$ 1.6)                    | 0.557          |
| Female, n (%)                    | 40 (58.8%)         | 6 (54.5%)                             | 34 (40.4%)                           | 0.502          |
| Race                             |                    |                                       |                                      | 0.753          |
| Latinx                           | 21 (30.9%)         | 3 (27.3%)                             | 18 (31.6%)                           |                |
| Asian                            | 18 (26.5%)         | 3 (27.3%)                             | 18 (26.3%)                           |                |
| Black                            | 15 (22.1%)         | 3 (27.3%)                             | 12 (21.1%)                           |                |
| White                            | 10 (14.7%)         | 2 (18.2%)                             | 8 (14.0%)                            |                |
| Other                            | 4 (5.8%)           | 0 (0%)                                | 4 (7.0%)                             |                |
| Comorbidities                    |                    |                                       |                                      |                |
| Hypertension                     | 13 (19.1%)         | 2 (18.2%)                             | 11 (19.3%)                           | 0.650          |
| Diabetes                         | 6 (8.8%)           | 0 (0%)                                | 6 (10.5%)                            | 0.332          |
| COPD and asthma                  | 13 (19.1%)         | 1 (9.1%)                              | 12 (21.1%)                           | 0.326          |
| Number of symptoms, median (IQR) | -                  | -                                     | 4.0 (2.0-5.0)                        |                |
| Length of symptoms               |                    |                                       |                                      |                |
| <7 days                          | -                  | -                                     | 19 (33.3%)                           |                |
| 7-14 days                        | -                  | -                                     | 12 (21.1%)                           |                |
| >14 days                         | -                  | -                                     | 26 (45.6%)                           |                |
| Degree of HCW exposure           |                    |                                       |                                      | 0.492          |
| High and Moderate                | 16 (23.5%)         | 2 (18.2%)                             | 14 (24.6%)                           |                |
| Minor                            | 52 (76.5%)         | 9 (81.8%)                             | 43 (75.4%)                           |                |
| Community exposure               | 19 (27.9%)         | 3 (27.3%)                             | 16 (28.1%)                           | 0.635          |

|                                                    |                     |                    |                     |       |
|----------------------------------------------------|---------------------|--------------------|---------------------|-------|
| Household exposure                                 | 17 (25.4%)          | 3 (27.3%)          | 14 (24.6%)          | 0.557 |
| Use of facemask outside of hospital                | 58 (85.3%)          | 9 (81.8%)          | 49 (86.0%)          | 0.722 |
| Principal means of transportation                  |                     |                    |                     | 0.663 |
| Public                                             | 33 (48.5%)          | 6 (54.5%)          | 27 (47.7%)          |       |
| Private                                            | 35 (51.5%)          | 5 (45.5%)          | 30 (52.6%)          |       |
| Nature of work                                     |                     |                    |                     | 0.502 |
| Physician                                          | 29 (42.6%)          | 4 (36.4%)          | 25 (43.9%)          |       |
| Nurse                                              | 15 (22.1%)          | 2 (18.2%)          | 13 (22.8%)          |       |
| Other                                              | 24 (35.3%)          | 5 (45.5%)          | 19 (33.3%)          |       |
| Hospital areas work in:                            |                     |                    |                     | 0.288 |
| Emergency department/inpatient units               | 32 (47.1%)          | 6 (54.5%)          | 26 (45.6%)          |       |
| Ambulatory care/clinics                            | 9 (13.2%)           | 2 (18.2%)          | 7 (12.3%)           |       |
| Inpatient and outpatient setting                   | 18 (26.5%)          | 3 (27.3%)          | 15 (26.3%)          |       |
| Administration/nonclinical care areas              | 9 (13.2%)           | 0 (0%)             | 9 (15.8%)           |       |
| Anti-spike reactivity (AUC)                        |                     |                    |                     |       |
| Reactivity in phase 1, G-Mean (IQR)                | 6590 (5165-8410)    | 5803 (2825-11920)  | 6754 (5177-8812)    | 0.647 |
| Days from symptoms to first test, Mean ( $\pm$ SD) | -                   | -                  | 47.7 ( $\pm$ 1.9)   |       |
| Reactivity in phase 2, G-Mean (IQR)                | 2226 (1824-2718)    | 2382 (1494-3797)   | 2198 (1753-2755)    | 0.980 |
| Days from symptoms to second test                  |                     |                    | 174.5 ( $\pm$ 4.1)  |       |
| Rate of decay, G-Mean (IQR)                        | 31.14 (22.11-43.87) | 23.42 (8.45-64.93) | 32.96 (22.73-47.82) | 0.382 |

Continuous variables are expressed as mean (SD) or interquartile range (IQR), categorical

---

variables as n (%).

AUC, area under the curve; COPD, Chronic obstructive pulmonary disease; HCW, health care worker

489

490



491

**Table 3:** Multiple linear regression analysis of rate of decay for anti-spike antibodies between Phase 1 and Phase 2

| Rate of decay<br>(log10)        | <i>B</i> | 95.0% CI for <i>B</i> |        | <i>SE B</i> | $\beta$ | $R^2$ | $\blacktriangle R^2$ |
|---------------------------------|----------|-----------------------|--------|-------------|---------|-------|----------------------|
|                                 |          | LL                    | UL     |             |         |       |                      |
| <b>Model</b>                    |          |                       |        |             |         | 0.83  | 0.82                 |
| <b>Constant</b>                 | -3.203** | -3.647                | -2.759 | .222        |         |       |                      |
| <b>Age (per 10-year change)</b> | .014     | -.005                 | .007   | .002        | .030    |       |                      |
| <b>BCG vaccination</b>          | .131**   | .030                  | .310   | .046        | .121    |       |                      |
| <b>Number of symptoms</b>       | .013     | -.029                 | .060   | .012        | .050    |       |                      |
| <b>ELISA reactivity (Log10)</b> | 1.159**  | 1.050                 | 1.419  | .059        | .916    |       |                      |

*B*: Unstandardized regression coefficient; CI: confidence interval; LL: lower limit; UL: upper limit; *SE B*: standard error of the coefficient;  $\beta$ : standardized coefficient;  $R^2$ : coefficient of determination;  $\blacktriangle R^2$ : adjusted  $R^2$ .

\*\* $P < 0.05$

BCG, Bacillus Calmette–Guérin vaccine

492

493 **Figure 1: Flow Chart of patient enrollment, follow up and analysis**

494

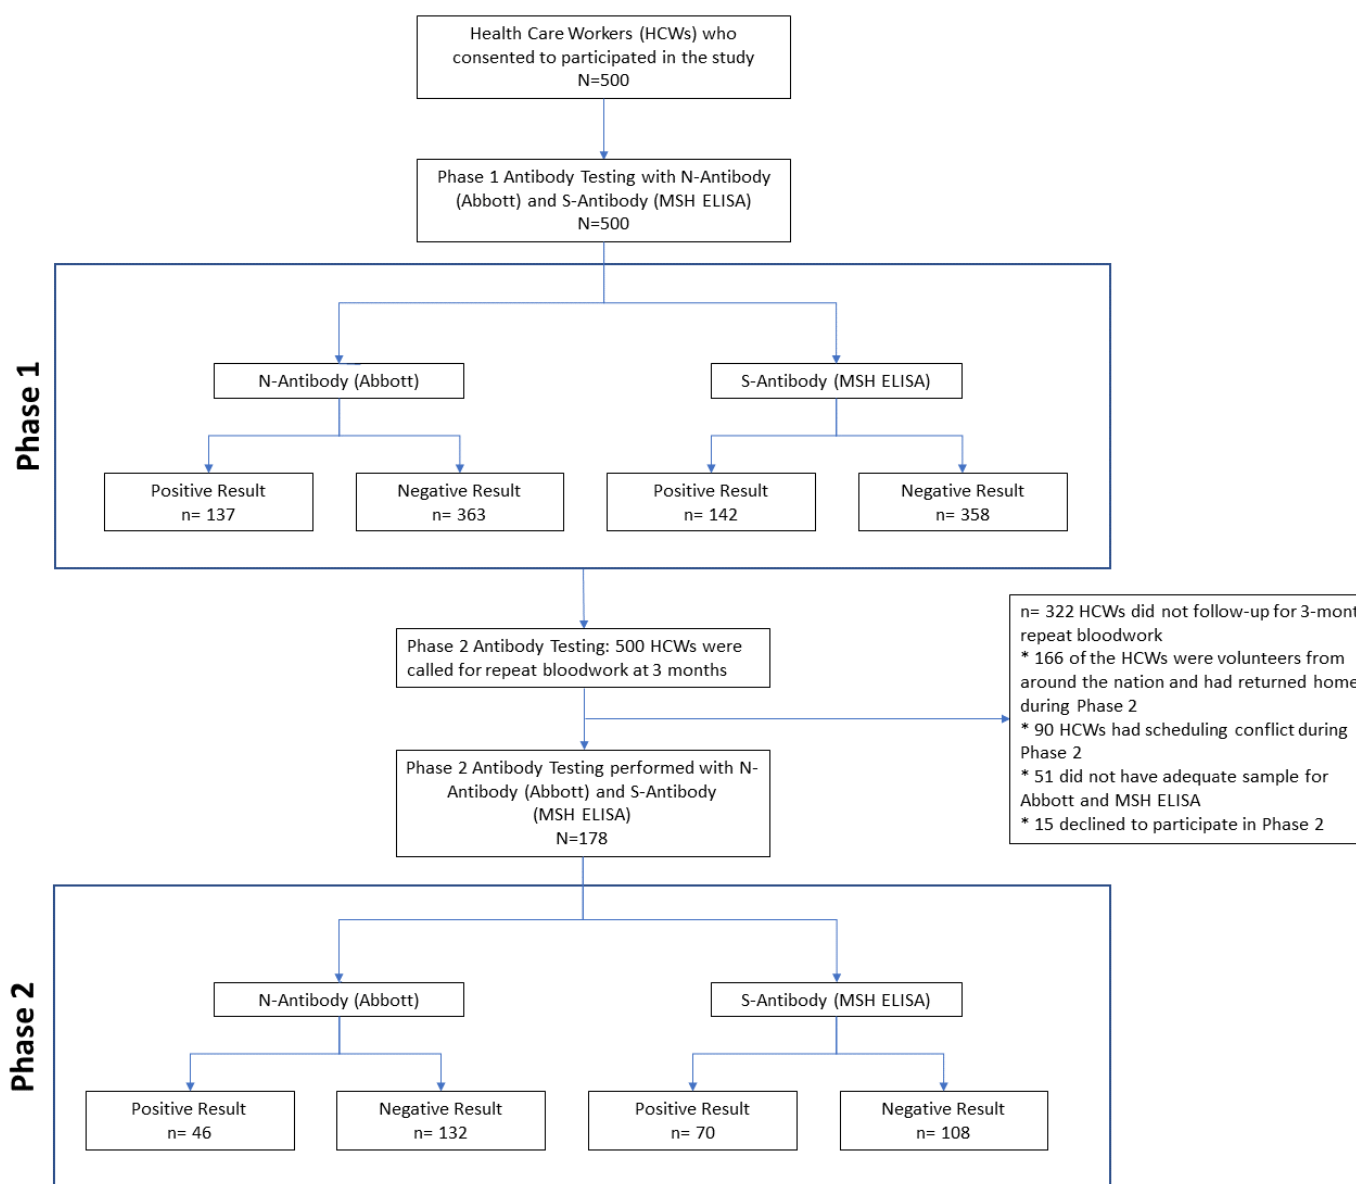

495

496

497

498

499

500

501

502 **Figure 2: Simple correlation analysis of HCW with positive reactivity for anti- spike antibody in Phase 1 with baseline**  
 503 **characteristics and symptoms**

|                                     |      |                                     |          |          |               |             |         |         |             |                    |                  |                        |  |
|-------------------------------------|------|-------------------------------------|----------|----------|---------------|-------------|---------|---------|-------------|--------------------|------------------|------------------------|--|
| ELISA reactivity in Phase 1 (Log10) | R    | 1                                   |          |          |               |             |         |         |             |                    |                  |                        |  |
|                                     | Sig. | -                                   |          |          |               |             |         |         |             |                    |                  |                        |  |
| Age                                 | R    | 0.269**                             | 1        |          |               |             |         |         |             |                    |                  |                        |  |
|                                     | Sig. | 0.001                               | -        |          |               |             |         |         |             |                    |                  |                        |  |
| Gender                              | R    | 0.106                               | 0.050    | 1        |               |             |         |         |             |                    |                  |                        |  |
|                                     | Sig. | 0.209                               | 0.552    | -        |               |             |         |         |             |                    |                  |                        |  |
| Comorbidities                       | R    | 0.130                               | 0.468**  | 0.045    | 1             |             |         |         |             |                    |                  |                        |  |
|                                     | Sig. | 0.123                               | 0.000    | 0.596    | -             |             |         |         |             |                    |                  |                        |  |
| BCG vaccine                         | R    | 0.046                               | 0.014    | -0.129   | 0.084         | 1           |         |         |             |                    |                  |                        |  |
|                                     | Sig. | 0.585                               | 0.869    | 0.125    | 0.317         | -           |         |         |             |                    |                  |                        |  |
| Fever                               | R    | 0.319**                             | 0.024    | -0.089   | 0.018         | 0.060       | 1       |         |             |                    |                  |                        |  |
|                                     | Sig. | 0.000                               | 0.777    | 0.292    | 0.828         | 0.479       | -       |         |             |                    |                  |                        |  |
| URS                                 | R    | 0.278**                             | 0.039    | 0.059    | 0.069         | -0.214*     | 0.464** | 1       |             |                    |                  |                        |  |
|                                     | Sig. | 0.001                               | 0.645    | 0.486    | 0.413         | 0.010       | 0.000   | -       |             |                    |                  |                        |  |
| GI symptoms                         | R    | 0.204*                              | 0.030    | 0.068    | 0.029         | 0.024       | 0.344** | 0.291** | 1           |                    |                  |                        |  |
|                                     | Sig. | 0.015                               | 0.723    | 0.423    | 0.733         | 0.775       | 0.000   | 0.000   | -           |                    |                  |                        |  |
| Number of symptoms                  | R    | 0.310**                             | -0.015   | 0.070    | 0.026         | 0.019       | 0.708** | 0.665** | 0.630**     | 1                  |                  |                        |  |
|                                     | Sig. | 0.000                               | 0.856    | 0.405    | 0.762         | 0.825       | 0.000   | 0.000   | 0.000       | -                  |                  |                        |  |
| Days of symptoms                    | R    | 0.434**                             | 0.036    | 0.019    | 0.121         | -0.038      | 0.422** | 0.605** | 0.347**     | 0.681**            | 1                |                        |  |
|                                     | Sig. | 0.000                               | 0.671    | 0.817    | 0.151         | 0.656       | 0.000   | 0.000   | 0.000       | 0.000              | -                |                        |  |
| Degree of HCW exposure              | R    | -0.145                              | -0.215** | -0.217** | -0.177*       | 0.017       | 0.017   | 0.034   | 0.000       | 0.039              | -0.085           | 1                      |  |
|                                     | Sig. | 0.083                               | 0.010    | 0.009    | 0.034         | 0.838       | 0.844   | 0.690   | 0.998       | 0.640              | 0.314            | -                      |  |
|                                     |      | ELISA reactivity in Phase 1 (Log10) | Age      | Gender   | Comorbidities | BCG vaccine | Fever   | URS     | GI symptoms | Number of symptoms | Days of symptoms | Degree of HCW exposure |  |

BCG, Bacillus Calmette-Guérin; URS, upper respiratory symptoms; GI, Gastrointestinal symptoms (nausea, vomit and diarrhoea); HCW, health care worker.  
 \*\*. Correlation is significant at the 0.01 level., \*. Correlation is significant at the 0.05 level.

504  
 505  
 506  
 507

508

509 **Figure 3: Simple correlation analysis of rate of decay of anti-spike antibodies between both phases with baseline**  
 510 **characteristics and symptoms**

|                          |      |                              |                                 |            |               |                    |              |                    |                           |                             |                               |
|--------------------------|------|------------------------------|---------------------------------|------------|---------------|--------------------|--------------|--------------------|---------------------------|-----------------------------|-------------------------------|
| Rate of decay (Log10)    | R    | 1                            |                                 |            |               |                    |              |                    |                           |                             |                               |
|                          | sig. | -                            |                                 |            |               |                    |              |                    |                           |                             |                               |
| ELISA reactivity (Log10) | R    | 0.898**                      | 1                               |            |               |                    |              |                    |                           |                             |                               |
|                          | sig. | 0                            | -                               |            |               |                    |              |                    |                           |                             |                               |
| Age                      | R    | 0.176                        | 0.182                           | 1          |               |                    |              |                    |                           |                             |                               |
|                          | sig. | 0.198                        | 0.184                           | -          |               |                    |              |                    |                           |                             |                               |
| Gender                   | R    | 0.044                        | 0.094                           | 0.001      | 1             |                    |              |                    |                           |                             |                               |
|                          | sig. | 0.751                        | 0.493                           | 0.994      | -             |                    |              |                    |                           |                             |                               |
| Comorbidity              | R    | 0.193                        | 0.156                           | 0.514**    | -0.092        | 1                  |              |                    |                           |                             |                               |
|                          | sig. | 0.158                        | 0.257                           | 0.000      | 0.502         | -                  |              |                    |                           |                             |                               |
| Fever                    | R    | 0.428**                      | 0.463**                         | -0.090     | -0.090        | -0.122             | 1            |                    |                           |                             |                               |
|                          | sig. | 0.001                        | 0.000                           | 0.515      | 0.512         | 0.374              | -            |                    |                           |                             |                               |
| GI symptoms              | R    | 0.340*                       | 0.289*                          | -0.020     | -0.072        | -0.163             | 0.269*       | 1                  |                           |                             |                               |
|                          | sig. | 0.011                        | 0.033                           | 0.885      | 0.603         | 0.234              | 0.047        | -                  |                           |                             |                               |
| Number of symptoms       | R    | 0.357**                      | 0.360**                         | -0.256     | 0.008         | -0.193             | 0.640**      | 0.555**            | 1                         |                             |                               |
|                          | sig. | 0.007                        | 0.007                           | 0.059      | 0.954         | 0.158              | 0.000        | 0.000              | -                         |                             |                               |
| Duration of symptoms     | R    | 0.469**                      | 0.469**                         | -0.049     | 0.123         | 0.142              | 0.204        | 0.207              | 0.430**                   | 1                           |                               |
|                          | sig. | 0.000                        | 0.000                           | 0.723      | 0.370         | 0.300              | 0.136        | 0.129              | 0.001                     | -                           |                               |
| Degree of HCW exposure   | R    | 0.067                        | 0.106                           | 0.154      | 0.266*        | 0.202              | -0.136       | -0.075             | -0.184                    | 0.133                       | 1                             |
|                          | sig. | 0.625                        | 0.439                           | 0.261      | 0.050         | 0.140              | 0.321        | 0.586              | 0.180                     | 0.334                       | -                             |
|                          |      | <b>Rate of decay (Log10)</b> | <b>ELISA reactivity (Log10)</b> | <b>Age</b> | <b>Gender</b> | <b>Comorbidity</b> | <b>Fever</b> | <b>GI symptoms</b> | <b>Number of symptoms</b> | <b>Duration of symptoms</b> | <b>Degree of HCW exposure</b> |

BCG: Bacillus Calmette-Guérin; GI: Gastrointestinal symptoms (nausea, vomit and diarrhea); HCW: health care worker.

\*\* Correlation is significant at the 0.01 level, \* Correlation is significant at the 0.05 level

511

512

513 **Figure 4: Paired comparison between rate of decay of anti-spike antibody titres and patient**  
514 **characteristics**

515

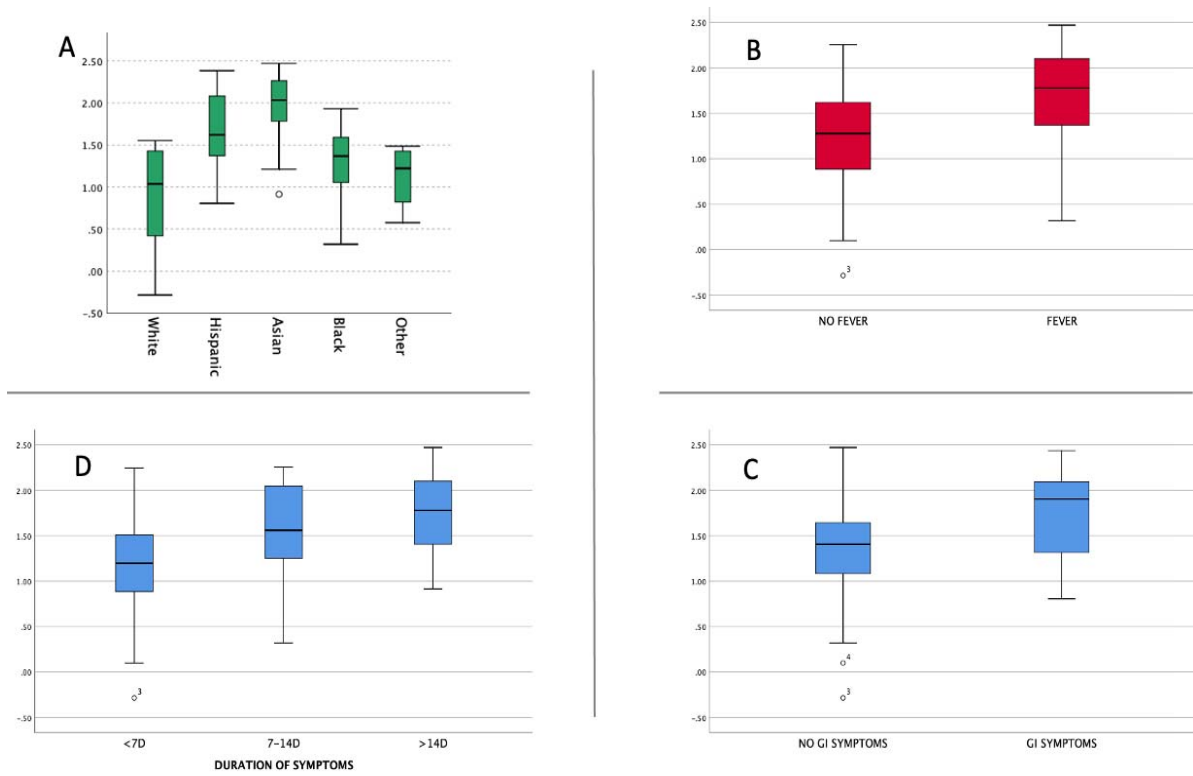

516

517

518

519

520

521

Phase 1

Health Care Workers (HCWs) who  
consented to participate in the study  
N=500

Phase 1 Antibody Testing with N-Antibody  
(Abbott) and S-Antibody (MSH ELISA)  
N=500

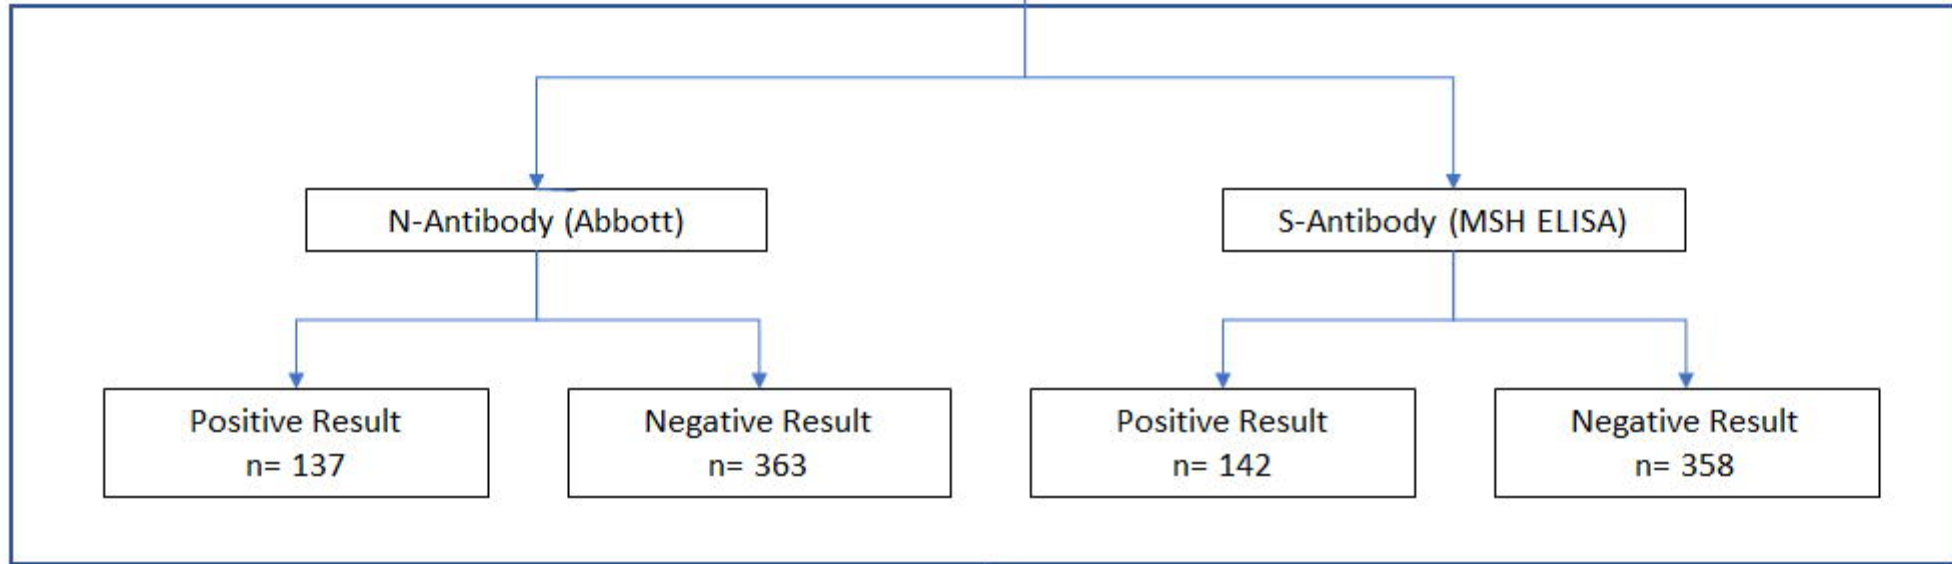

Phase 2

Phase 2 Antibody Testing: 500 HCWs were called for repeat bloodwork at 3 months

Phase 2 Antibody Testing performed with N-Antibody (Abbott) and S-Antibody (MSH ELISA)  
N=178

n= 322 HCWs did not follow-up for 3-month repeat bloodwork  
\* 166 of the HCWs were volunteers from around the nation and had returned home during Phase 2  
\* 90 HCWs had scheduling conflict during Phase 2  
\* 51 did not have adequate sample for Abbott and MSH ELISA  
\* 15 declined to participate in Phase 2

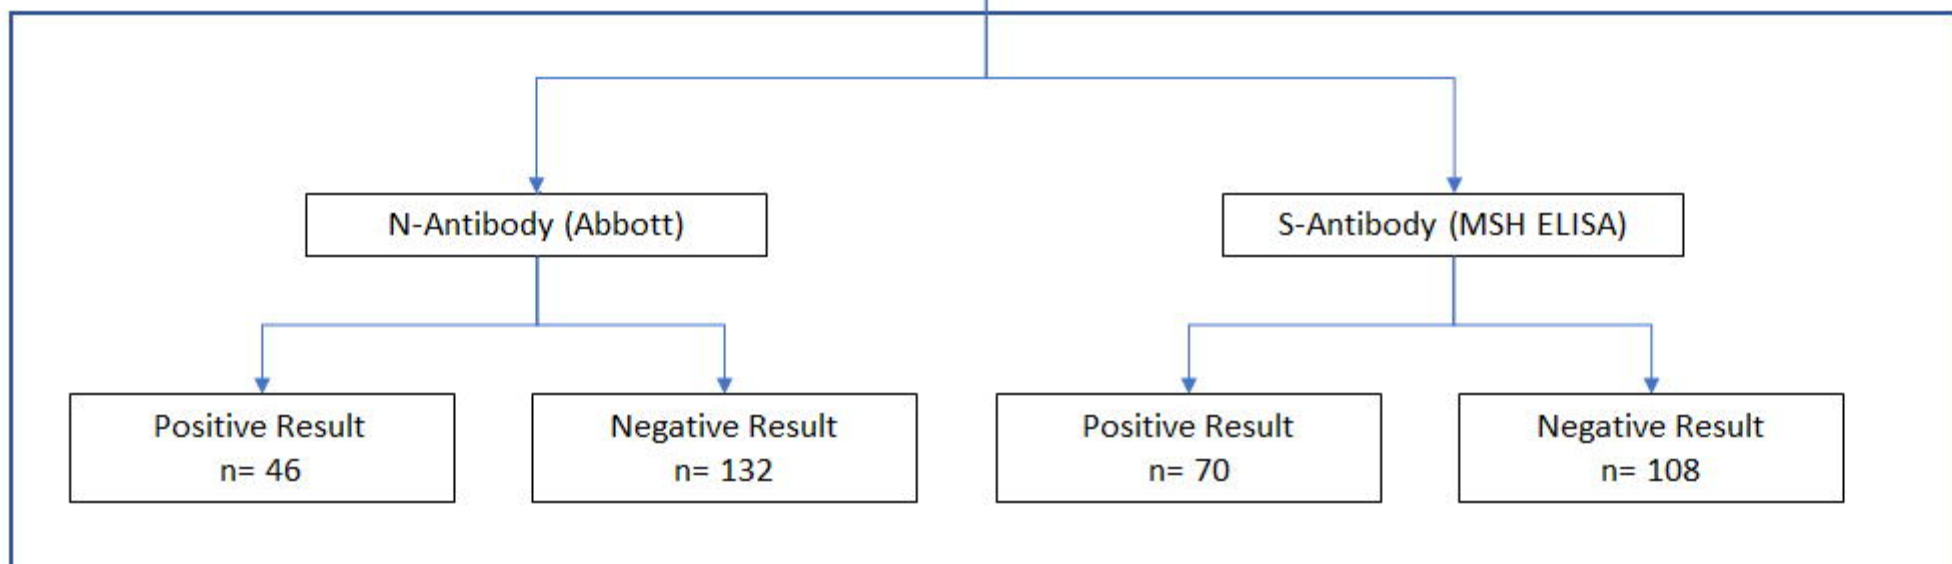



|                                     |      | ELISA reactivity in Phase 1 (Log10) | Age      | Gender   | Comorbidities | BCG vaccine | Fever   | URS     | GI symptoms | Number of symptoms | Days of symptoms | Degree of HCW exposure |
|-------------------------------------|------|-------------------------------------|----------|----------|---------------|-------------|---------|---------|-------------|--------------------|------------------|------------------------|
| ELISA reactivity in Phase 1 (Log10) | R    | -                                   |          |          |               |             |         |         |             |                    |                  |                        |
|                                     | Sig. | -                                   |          |          |               |             |         |         |             |                    |                  |                        |
| Age                                 | R    | 0.269**                             | 1        |          |               |             |         |         |             |                    |                  |                        |
|                                     | Sig. | 0.001                               | -        |          |               |             |         |         |             |                    |                  |                        |
| Gender                              | R    | 0.106                               | 0.050    | 1        |               |             |         |         |             |                    |                  |                        |
|                                     | Sig. | 0.209                               | 0.552    | -        |               |             |         |         |             |                    |                  |                        |
| Comorbidities                       | R    | 0.130                               | 0.468**  | 0.045    | 1             |             |         |         |             |                    |                  |                        |
|                                     | Sig. | 0.123                               | 0.000    | 0.596    | -             |             |         |         |             |                    |                  |                        |
| BCG vaccine                         | R    | 0.046                               | 0.014    | -0.129   | 0.084         | 1           |         |         |             |                    |                  |                        |
|                                     | Sig. | 0.585                               | 0.869    | 0.125    | 0.317         | -           |         |         |             |                    |                  |                        |
| Fever                               | R    | 0.319**                             | 0.024    | -0.089   | 0.018         | 0.060       | 1       |         |             |                    |                  |                        |
|                                     | Sig. | 0.000                               | 0.777    | 0.292    | 0.828         | 0.479       | -       |         |             |                    |                  |                        |
| URS                                 | R    | 0.278**                             | 0.039    | 0.059    | 0.069         | -0.214*     | 0.464** | 1       |             |                    |                  |                        |
|                                     | Sig. | 0.001                               | 0.645    | 0.486    | 0.413         | 0.010       | 0.000   | -       |             |                    |                  |                        |
| GI symptoms                         | R    | 0.204*                              | 0.030    | 0.068    | 0.029         | 0.024       | 0.344** | 0.291** | 1           |                    |                  |                        |
|                                     | Sig. | 0.015                               | 0.723    | 0.423    | 0.733         | 0.775       | 0.000   | 0.000   | -           |                    |                  |                        |
| Number of symptoms                  | R    | 0.310**                             | -0.015   | 0.070    | 0.026         | 0.019       | 0.708** | 0.665** | 0.630**     | 1                  |                  |                        |
|                                     | Sig. | 0.000                               | 0.856    | 0.405    | 0.762         | 0.825       | 0.000   | 0.000   | 0.000       | -                  |                  |                        |
| Days of symptoms                    | R    | 0.434**                             | 0.036    | 0.019    | 0.121         | -0.038      | 0.422** | 0.605** | 0.347**     | 0.681**            | 1                |                        |
|                                     | Sig. | 0.000                               | 0.671    | 0.817    | 0.151         | 0.656       | 0.000   | 0.000   | 0.000       | 0.000              | -                |                        |
| Degree of HCW exposure              | R    | -0.145                              | -0.215** | -0.217** | -0.177*       | 0.017       | 0.017   | 0.034   | 0.000       | 0.039              | -0.085           | 1                      |
|                                     | Sig. | 0.083                               | 0.010    | 0.009    | 0.034         | 0.838       | 0.844   | 0.690   | 0.998       | 0.640              | 0.314            | -                      |

BCG, Bacillus Calmette–Guérin; URS, upper respiratory symptoms; GI, Gastrointestinal symptoms (nausea, vomit and diarrhoea); HCW, health care worker.

\*\* . Correlation is significant at the 0.01 level., \* . Correlation is significant at the 0.05 level.



|                                 |      |                              |                                 |            |               |                    |              |                    |                           |                             |                               |  |
|---------------------------------|------|------------------------------|---------------------------------|------------|---------------|--------------------|--------------|--------------------|---------------------------|-----------------------------|-------------------------------|--|
| <b>Rate of decay (Log10)</b>    | R    | 1                            |                                 |            |               |                    |              |                    |                           |                             |                               |  |
|                                 | sig. | -                            |                                 |            |               |                    |              |                    |                           |                             |                               |  |
| <b>ELISA reactivity (Log10)</b> | R    | 0.898**                      | 1                               |            |               |                    |              |                    |                           |                             |                               |  |
|                                 | sig. | 0                            | -                               |            |               |                    |              |                    |                           |                             |                               |  |
| <b>Age</b>                      | R    | 0.176                        | 0.182                           | 1          |               |                    |              |                    |                           |                             |                               |  |
|                                 | sig. | 0.198                        | 0.184                           | -          |               |                    |              |                    |                           |                             |                               |  |
| <b>Gender</b>                   | R    | 0.044                        | 0.094                           | 0.001      | 1             |                    |              |                    |                           |                             |                               |  |
|                                 | sig. | 0.751                        | 0.493                           | 0.994      | -             |                    |              |                    |                           |                             |                               |  |
| <b>Comorbidity</b>              | R    | 0.193                        | 0.156                           | 0.514**    | -0.092        | 1                  |              |                    |                           |                             |                               |  |
|                                 | sig. | 0.158                        | 0.257                           | 0.000      | 0.502         | -                  |              |                    |                           |                             |                               |  |
| <b>Fever</b>                    | R    | 0.428**                      | 0.463**                         | -0.090     | -0.090        | -0.122             | 1            |                    |                           |                             |                               |  |
|                                 | sig. | 0.001                        | 0.000                           | 0.515      | 0.512         | 0.374              | -            |                    |                           |                             |                               |  |
| <b>GI symptoms</b>              | R    | 0.340*                       | 0.289*                          | -0.020     | -0.072        | -0.163             | 0.269*       | 1                  |                           |                             |                               |  |
|                                 | sig. | 0.011                        | 0.033                           | 0.885      | 0.603         | 0.234              | 0.047        | -                  |                           |                             |                               |  |
| <b>Number of symptoms</b>       | R    | 0.357**                      | 0.360**                         | -0.256     | 0.008         | -0.193             | 0.640**      | 0.555**            | 1                         |                             |                               |  |
|                                 | sig. | 0.007                        | 0.007                           | 0.059      | 0.954         | 0.158              | 0.000        | 0.000              | -                         |                             |                               |  |
| <b>Duration of symptoms</b>     | R    | 0.469**                      | 0.469**                         | -0.049     | 0.123         | 0.142              | 0.204        | 0.207              | 0.430**                   | 1                           |                               |  |
|                                 | sig. | 0.000                        | 0.000                           | 0.723      | 0.370         | 0.300              | 0.136        | 0.129              | 0.001                     | -                           |                               |  |
| <b>Degree of HCW exposure</b>   | R    | 0.067                        | 0.106                           | 0.154      | 0.266*        | 0.202              | -0.136       | -0.075             | -0.184                    | 0.133                       | 1                             |  |
|                                 | sig. | 0.625                        | 0.439                           | 0.261      | 0.050         | 0.140              | 0.321        | 0.586              | 0.180                     | 0.334                       | -                             |  |
|                                 |      | <b>Rate of decay (Log10)</b> | <b>ELISA reactivity (Log10)</b> | <b>Age</b> | <b>Gender</b> | <b>Comorbidity</b> | <b>Fever</b> | <b>GI symptoms</b> | <b>Number of symptoms</b> | <b>Duration of symptoms</b> | <b>Degree of HCW exposure</b> |  |

**BCG:** Bacillus Calmette–Guérin; GI: Gastrointestinal symptoms (nausea, vomit and diarrhea); HCW: health care worker.

\*\* . Correlation is significant at the 0.01 level, \* . Correlation is significant at the 0.05 level



**A**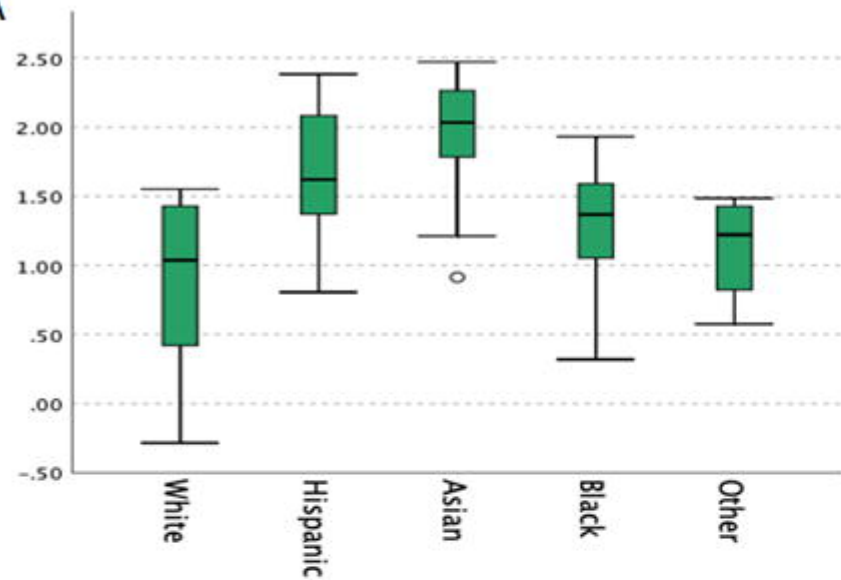**B**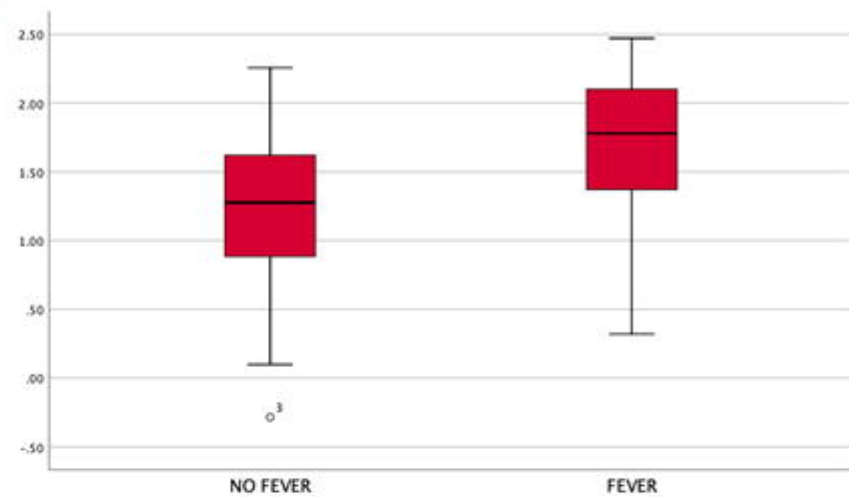**D**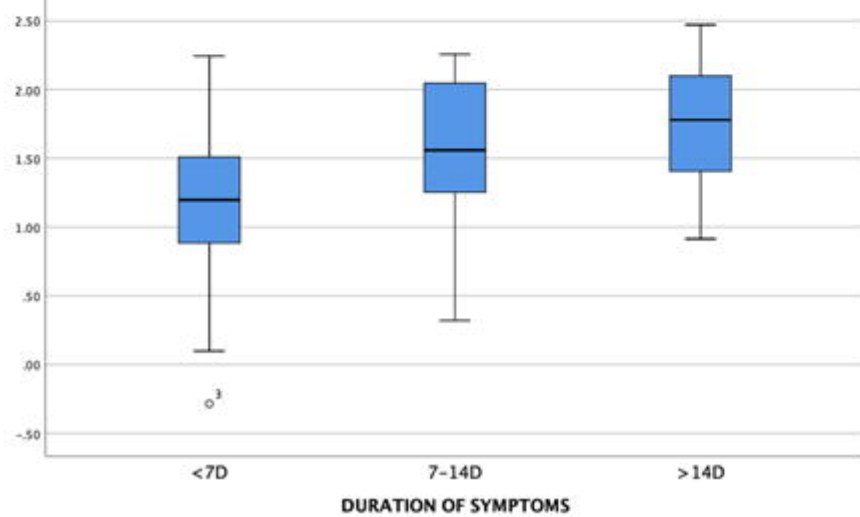**C**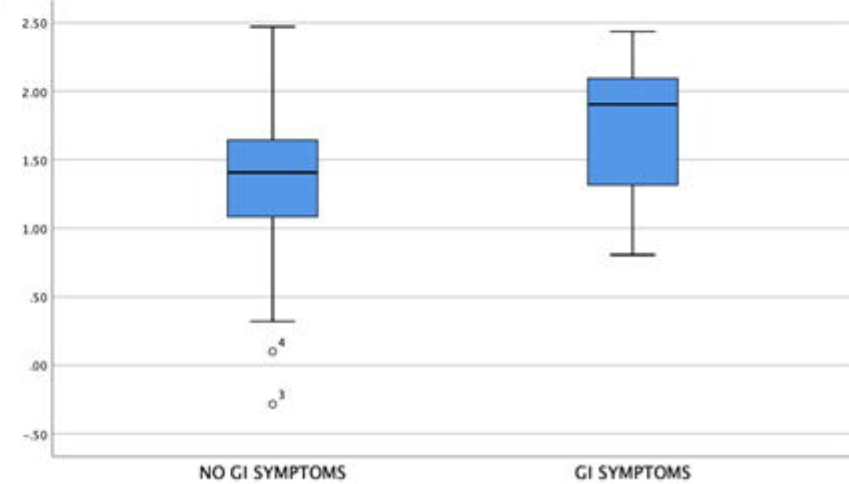

Source: https://medrxiv.org/content/10.1101/2021.03.02.21252362v1.full.pdf
